# Supplementary material for: Self-assembled peptide-based supramolecular hydrogel for ophthalmic drug delivery
Source: Royal Society of Chemistry journal article supplement (doi:10.1039/c6ra11691d), 2016-01-01
Supplement: c6ra11691d1.pdf [file c6ra11691d1.pdf]

## Supporting information

### **Circular dichroism (CD) spectroscopy**

The circular dichroism experiment was performed in 0.01cm quartz cells with a circular dichroism spectrometer (Jasco J-810). Spectra were recorded between 180 and 300nm with a 1 nm data pitch.

### **In vitro degradation test**

Three different DIC loaded Nap-GFFY hydrogels (0.1%, 0.2% and 0.3% DIC, w/v) were adopted for in vitro degradation test. Briefly, 0.5ml hydrogel was transferred into a 10ml glass vial followed by the addition of 2ml PBS (pH=7.4) for incubation at 37°C with stirring at 100rpm/min for the degradation study. The volume changes of hydrogel was recorded and the degradation was calculated by the following formula: Degradation (%)=(Original volume of hydrogel-Volume of hydrogel at predetermined time point)/Original volume of hydrogel ×100.

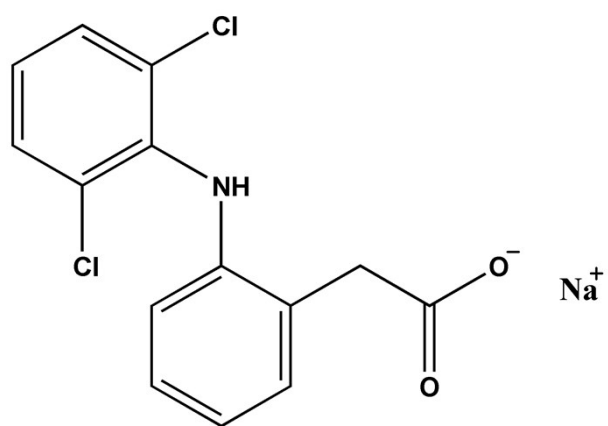

**Fig.S1** Chemical structure of diclofenac sodium

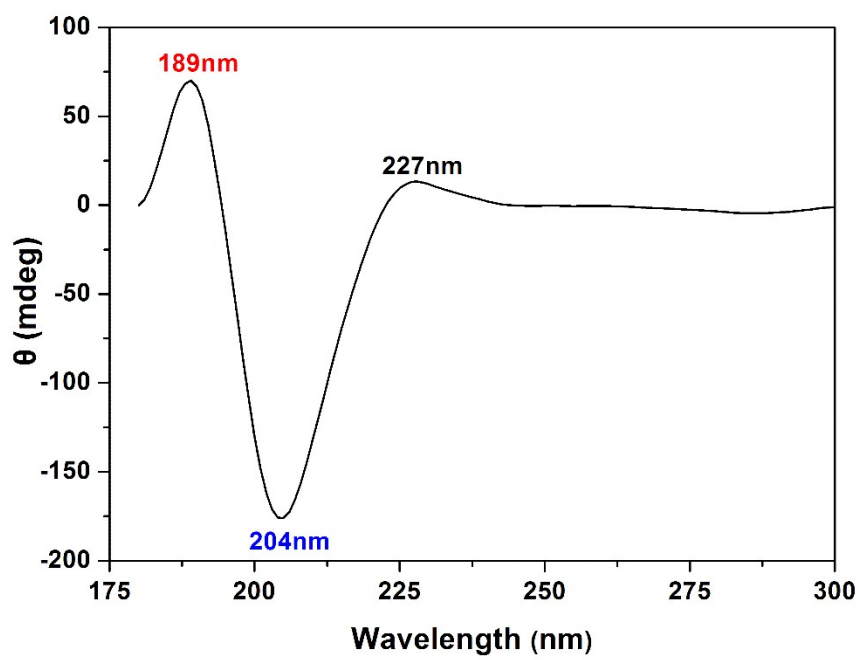

**Fig.S2** Circular dichroism (CD) spectrum of Nap-GFFY hydrogel

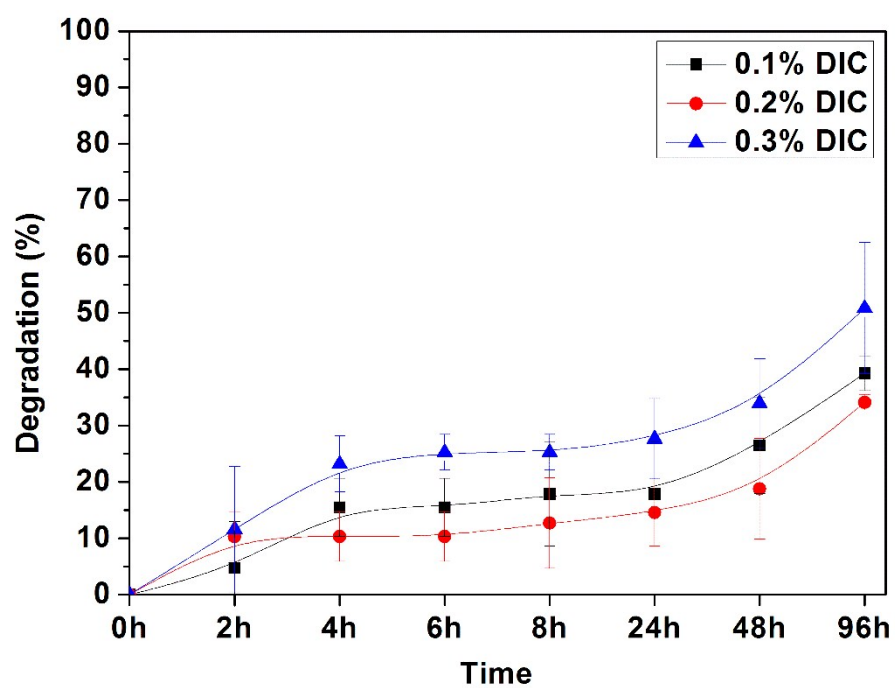

**Fig.S3** In vitro degradation profile of DIC loaded Nap-GFFY hydrogels (0.1%, 0.2% and 0.3% DIC, w/v) at 37°C in PBS (pH=7.4). Bars shown are mean $\pm$ SE, (n=3).
